6. Chlormethiazole: Proceedings of a Symposium. Acta Psychiatr Scand suppl 192, 1966
7. Campbell D, Forrest AC, Miller DC, et al: A preliminary clinical study of CT 1341—a steroid anaesthetic agent. Br J Anaesth 43:14-24, 1971
8. Clarke RSJ, Montgomery SJ, Dundee JW, et al: Clinical studies of induction agents. XXXIX: CT 1341, a new steroid anaesthetic. Br J Anaesth 43:947-952, 1971
9. Duffus GM, Tunstall ME, MacGillivray I: Intravenous chlormethiazole in pre-eclamptic toxemia in labour. Lancet 1:335-337, 1968
10. Bovill JG, Coppel DL, Dundee JW, et al: Current status of ketamine anaesthesia. Lancet 1:1285-1288, 1971
11. Coppel DL, Dundee JW: Ketamine anaesthesia for cardiac catheterisation. Anaesthesia 27:25-31, 1972
12. Bosomworth PP: Ketamine Symposium—comments by moderator. Anesth Analg (Cleve) 50:471-479, 1971
13. Bush GH: Discussion on ketamine anaesthesia for burns surgery. Postgrad Med J 48: 156-161, 1972
14. Penrose BH: Aspiration pneumonia following ketamine induction for general anaesthesia. Anesth Analg (Cleve) 51:41-43, 1972
15. Healy TEJ, Robinson JS, Vickers MD: Physiological responses to intravenous diazepam as a sedative for conservative dentistry. Br Med J 3:10-13, 1970
16. Tomlin PJ, Howarth FH, Robinson JS: Post-operative atelectasis and laryngeal incompetence. Lancet 1:1402-1405, 1968
17. Wise CC, Robinson JS, Heath MJ, et al: Physiological responses to intermittent methohexitone for conservative dentistry. Br Med J 2:540-543, 1969
18. Mann PE, Hatt SD, Dixon RA, et al: A minimal increment methohexitone technique in conservative dentistry—a comparison with treatment under local analgesia. Anaesthesia 26:3-21, 1971
19. Hinkle JE, Tantum KR: A technique for measuring reactivity of the glottis. Anesthesiology 35:634-637, 1971

---

### Obstetrics

**ABORTION AND COAGULATION FACTORS** Coagulation studies were carried out in 40 patients undergoing induced abortion by intra-amniotic injection of hypertonic saline solution. Other reports have indicated that severe defibrination syndromes can occur with this method of abortion. Findings of the study included: 1) no significant change in prothrombin time, partial thromboplastin time, or fibrinogen level; 2) a lowered platelet count, as well as profibrinolysin and fibrinolytic inhibitor levels; 3) the appearance of soluble fibrin monomers in plasma; 4) a decrease in factor VIII. The association of decreased platelet count, decreased factor VIII and evidence of soluble fibrin monomers suggests that early incomplete activation of the coagulation system was taking place. In addition, the reduced profibrinolysin and fibrinolytic inhibitor levels indicated slight activation of the fibrinolytic system. Despite these changes, no sign of thrombosis or hemorrhage was evident in any patient studied. One patient, not included in the study, has since developed disseminated intravascular coagulation. The authors note that problems may develop in the rare patient with pre-existing coagulation defects, fibrinolytic defects, or thrombocytopenia. (Broun, F. D., Davidson, E. C., Jr., and Phillips L. L.: *Coagulation Change after Hypertonic Saline Infusion for Late Abortions*. *Obstet. Gynecol.* 39: 538-543, 1972.)
